# Supplementary material
Source: PubMed Central journal article supplement (PMC4786914)
Supplement: mt2015200x1.pdf [file mt2015200x1.pdf]

**Table S1: sgRNAs targeting the FSHD locus**

| sgRNA | target           | *19-nt sequence + PAM (NGG)             | score** | Enrich <sup>^</sup> | OT(12) <sup>#</sup> | OT(19) <sup>##</sup> |
|-------|------------------|-----------------------------------------|---------|---------------------|---------------------|----------------------|
| 1     | p13-E11          | TACCACAGACAGCCA <u>ACTG</u> <b>GGG</b>  | 0.61    | 6.9                 | 18                  | 0                    |
| 2     | p13-E11          | TTCACCCAGAACAGTAACT <b>GGG</b>          | 0.60    | 1.6                 | 27                  | 0                    |
| 3     | <i>DUX4</i> E1   | CACCCGGGCAA <u>AAAGCCGG</u> <b>GAGG</b> | 0.61    | 2.5                 | 8                   | 1 (Y)                |
| 4     | <i>DUX4</i> E1   | CTGGAAGCACCCCTCAGCG <b>AGG</b>          | 0.85    | 2.4                 | 9                   | 3 (14/18/Y)          |
| 5     | <i>DUX4</i> E1   | CTGGAGGAGCTTTAGGACG <b>CGG</b>          | 0.65    | 2.2                 | 14                  | 6 (14/18/20/22/Y)    |
| 6     | <i>DUX4</i> prom | CTCGCTCTGGTCTTCTACG <b>TGG</b>          | 0.72    | 2.0                 | 4                   | 0                    |
| 7     | <i>DUX4</i> prom | CCGTCCGTGAAATTC <u>CGGC</u> <b>CGG</b>  | 0.76    | 1.7                 | 10                  | 1 (20)               |
| 8     | <i>DUX4</i> prom | TCCGACAGCACCC <u>TCCCCG</u> <b>CGG</b>  | 0.79    | 2.6                 | 19                  | 3 (3/14/Y)           |
| 9     | <i>DUX4</i> E3   | CTCCCTTGCACGTCAGCC <u>G</u> <b>GGG</b>  | 0.84    | 3.4                 | 7                   | 2 (14/18)            |
| 10    | <i>DUX4</i> E3   | GAATTTCA <u>CGGA</u> GAACA <b>AGGG</b>  | 0.76    | 1.8                 | 5                   | 0                    |
| 11    | <i>DUX4</i> E3   | ATCTTCTATAGGATCCAC <b>AGGG</b>          | 0.88    | 2.0                 | 9                   | 0                    |

\*CpGs are underlined

\*\*sgRNA Designer score (<http://www.broadinstitute.org/rnai/public/analysis-tools/sgrna-design>).

<sup>^</sup>Relative enrichment of dCas9-VP64-HA (Addgene plasmid #50918) at each target region measured by chromatin immunoprecipitation (ChIP) using HA antibodies normalized to mouse IgG.

<sup>#</sup>Number of off-target (non-Ch 4/10) matches to 12-nt seed sequence + NGG in human genomic database (<https://blast.ncbi.nlm.nih.gov>).

<sup>##</sup>Number of off-target (non-Ch 4/10) matches to 19-nt sequence + NGG in human genomic database (<https://blast.ncbi.nlm.nih.gov>) (chromosomes in parentheses).

All off-target matches except those underlined are in D4Z4 homologous repeat sequences <sup>1,2</sup>.

## **Table S2: Sequences of oligonucleotide primers (5' to 3')**

### qRT-PCR primers (human):

DUX4-fl-F: GCTCTGCTGGAGGAGCTTTAGGA<sup>3</sup>  
DUX4-fl-R: GCAGGTCTGCWGGTACCTGG<sup>3</sup>  
MyHC1-F: TGGAGGCCAGGGTTCGTGAA<sup>3</sup>  
MyHC1-R: ATTGTTCCCTCCGCTTCTTCAGC<sup>3</sup>  
FRG1-F: TCTACAGAGACGTAGGCTGTCA<sup>4</sup>  
FRG1-R: CTTGAGCACGAGCTTGGTAG<sup>4</sup>  
FRG2-F: GGGAAAACCTGCAGGAAAA<sup>5</sup>  
FRG2-R: CTGGACAGTTCCTGCTGTGT<sup>5</sup>  
TRIM43-F: ACCCATCACTGGACTGGTGT<sup>6</sup>  
TRIM43-R: CACATCCTCAAAGAGCCTGA<sup>6</sup>  
ZSCAN4-F: TGGAAATCAAGTGGCAAAAA<sup>6</sup>  
ZSCAN4-R: CTGCATGTGGACGTGGAC<sup>6</sup>  
MBD3L2-F: GCGTTCACCTCTTTTCCAAG<sup>6</sup>  
MBD3L2-R: GCCATGTGGATTTCTCGTTT<sup>6</sup>  
Jumonji-F: AAGAAAAAGCCTCGAAAGTG  
Jumonji-R: AGAGCACACTCCAGACAGAA  
KLF14-F: TGCAACGTGTATATCATCCT  
KLF14-R: ACACCAGAGTCCTTTGAGAC  
UBR4-F: GGAGTCTGTGGCAACTGTGGAGAGAATG<sup>7</sup>  
UBR4-R: CCGGTCTTCTTCATTCTCAATGGGATCCACT<sup>7</sup>

### ChIP primers:

OT-F: GAATGTGGACACGGTAAAGA (intergenic region on Ch. 8, ref NC\_018919.2)  
OT-R: TAGGTTTGACTGCCAATGAC (intergenic region on Ch. 8, ref NC\_018919.2)  
p13-E11-F: TGGGCATTTTCTCATTAGCC  
p13-E11-R: CTGGAGCAGAGATGACCACA  
DUX4-exon1-F: GACACCCTCGGACAGCAC  
DUX4-exon1-R: GTACGGGTTCCGCTCAAAG  
DUX4-intron1-F: CTCAGCGAGGAAGAATACCG  
DUX4-intron1-R: AGTCTCTCACCGGGCCTAGA  
DUX4-exon3-F: CTGACGTGCAAGGGAGCT  
DUX4-exon3-R: CAGGTTTGCCTAGACAGCG

## Supplementary References

1. Zeng, W, Chen, YY, Newkirk, DA, Wu, B, Balog, J, Kong, X *et al.*, (2014). Genetic and epigenetic characteristics of FSHD-associated 4q and 10q D4Z4 that are distinct from non-4q/10q D4Z4 homologs. *Hum Mutat* **35**: 998-1010.
2. Altherr, MR, Bengtsson, U, Markovich, RP and Winokur, ST, (1995). Efforts toward understanding the molecular basis of facioscapulohumeral muscular dystrophy. *Muscle Nerve Suppl* **2**: S32-38.
3. Himeda, CL, Debarnot, C, Homma, S, Beermann, ML, Miller, JB, Jones, PL *et al.*, (2014). Myogenic enhancers regulate expression of the facioscapulohumeral muscular dystrophy associated DUX4 gene. *Mol Cell Biol* **34**: 1942-1955.
4. Bodega, B, Ramirez, GD, Grasser, F, Cheli, S, Brunelli, S, Mora, M *et al.*, (2009). Remodeling of the chromatin structure of the facioscapulohumeral muscular dystrophy (FSHD) locus and upregulation of FSHD-related gene 1 (FRG1) expression during human myogenic differentiation. *BMC Biol* **7**: 41.
5. Klooster, R, Straasheijm, K, Shah, B, Sowden, J, Frants, R, Thornton, C *et al.*, (2009). Comprehensive expression analysis of FSHD candidate genes at the mRNA and protein level. *Eur J Hum Genet* **17**: 1615-1624.
6. Geng, LN, Yao, Z, Snider, L, Fong, AP, Cech, JN, Young, JM *et al.*, (2012). DUX4 activates germline genes, retroelements, and immune mediators: Implications for facioscapulohumeral dystrophy. *Dev Cell* **22**: 38-51.
7. Tiedemann, RL, Putiri, EL, Lee, JH, Hlady, RA, Kashiwagi, K, Ordog, T *et al.*, (2014). Acute depletion redefines the division of labor among DNA methyltransferases in methylating the human genome. *Cell Rep* **9**: 1554-1566.
